# Supplementary material for: Chiral bis(phthalocyaninato) yttrium double-decker complexes. Synthesis, structure, spectroscopy, and electrochemistry
Source: Royal Society of Chemistry journal article supplement (doi:10.1039/c3dt52611a), 2013-10-15
Supplement: c3dt52611a.pdf [file c3dt52611a.pdf]

## **Supporting Information**

### **Chiral Bis(phthalocyaninato) Yttrium Double-Decker Complexes. Synthesis, Structure, Spectroscopy, and Electrochemistry**

**Hang Zhou, Kang Wang, Dongdong Qi, and Jianzhuang Jiang,\***

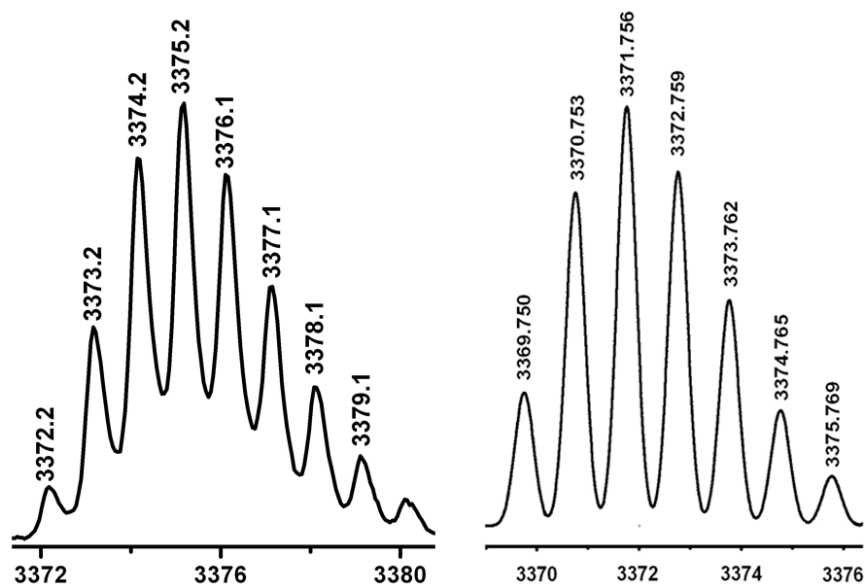

**Fig. S1.** Observed (left) and simulated (right) MALDI-TOF mass spectra of **1**.

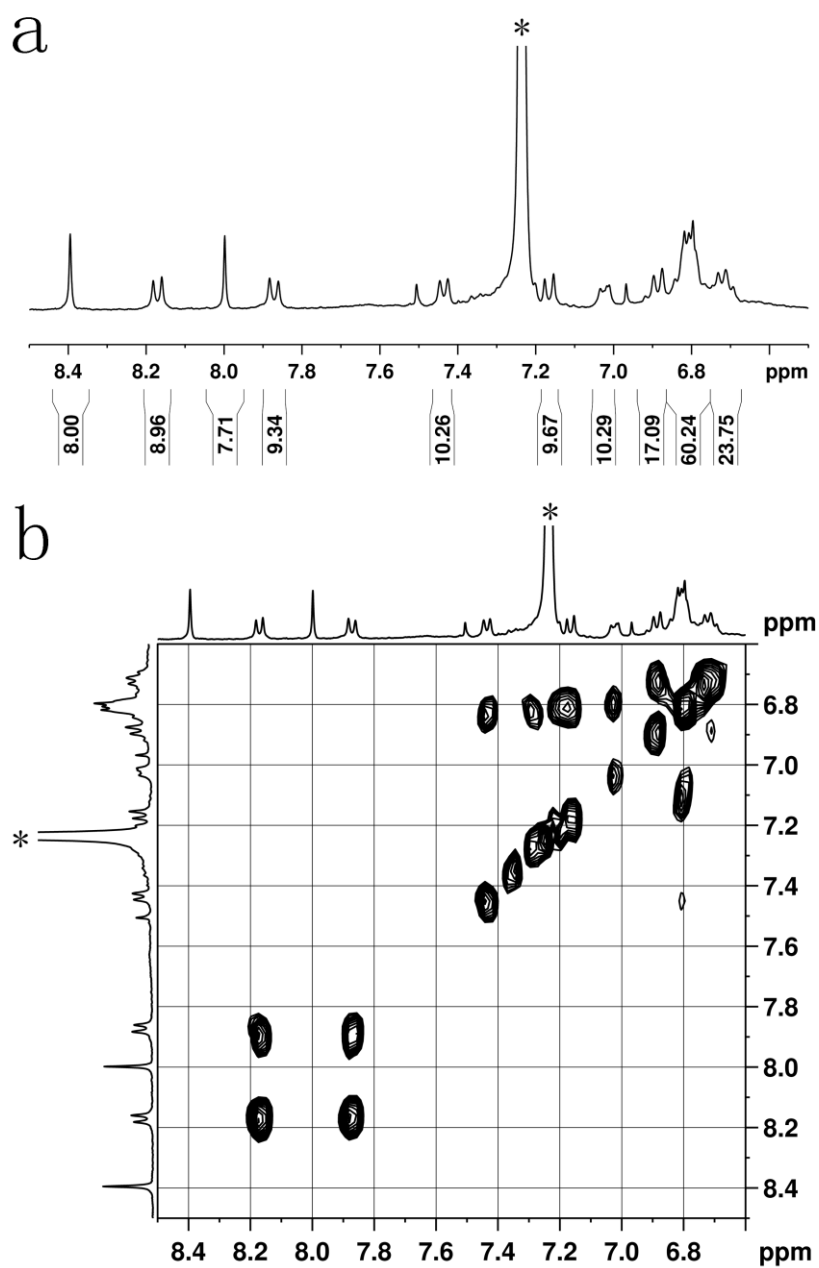

**Fig. S2.** (a)  $^1\text{H}$  NMR and (b)  $^1\text{H}$ - $^1\text{H}$  COSY for **1** recorded in  $\text{CDCl}_3$  in the presence of hydrazine hydrate. \* denotes a solvent impurity.

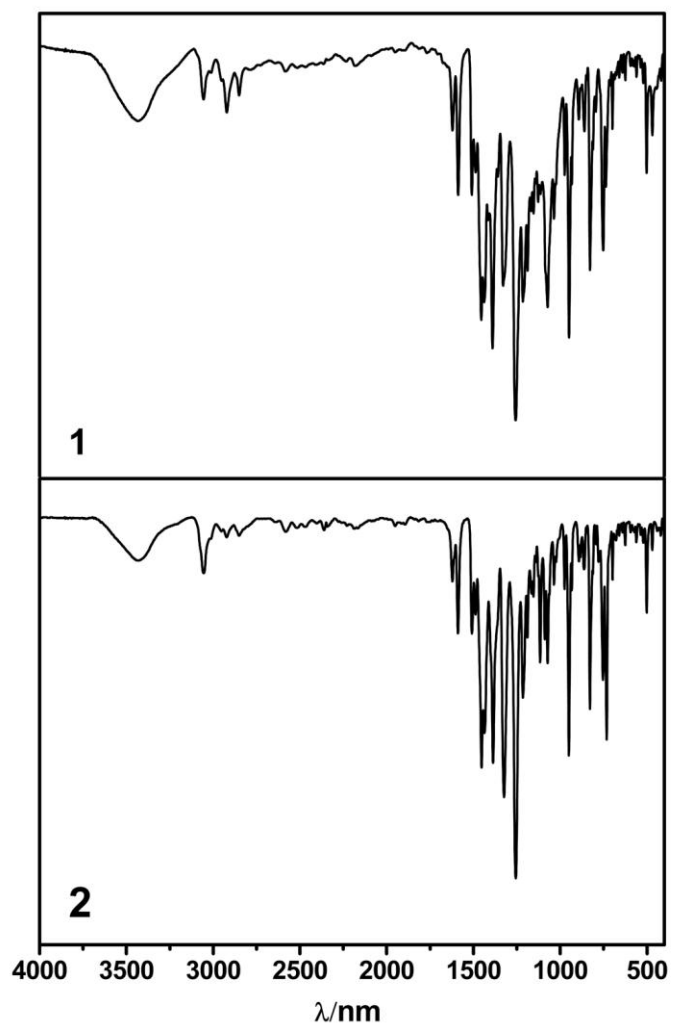

**Fig. S3.** IR spectra of **1** and **2** in the region of 400-4000  $\text{cm}^{-1}$  recorded in KBr pellets.

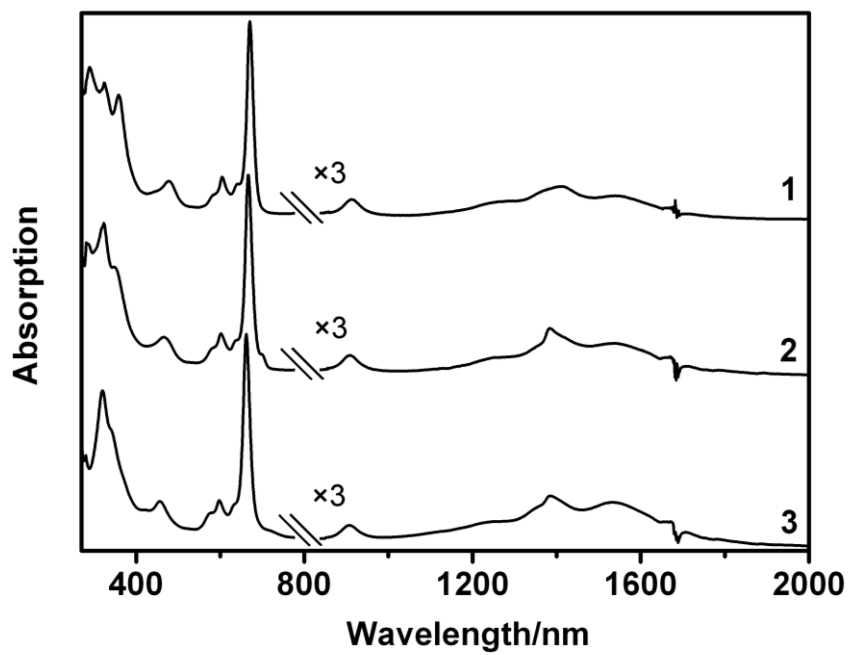

**Fig. S4.** Electronic absorption spectra of **1**, **2**, and  $\text{Y(Pc)}_2$  in toluene.

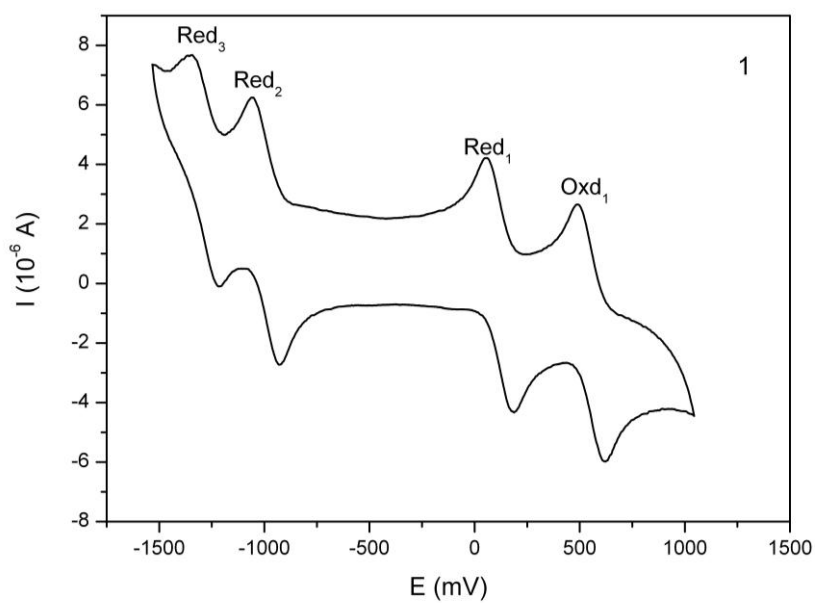

**Fig. S5.** Cyclic voltammogram of **1** recorded in CH<sub>2</sub>Cl<sub>2</sub> containing 0.1 M [NBu<sub>4</sub>][ClO<sub>4</sub>] at a scan rate 40 mV s<sup>-1</sup>.

**Table S1.** <sup>1</sup>H NMR data (δ) for **1** and **2**.

| compound | Signals for unsubstituted Pc   |                                                             |                                | Signals for Pc(OBNP) <sub>4</sub>                                                                     |                                                                                                                                                           |
|----------|--------------------------------|-------------------------------------------------------------|--------------------------------|-------------------------------------------------------------------------------------------------------|-----------------------------------------------------------------------------------------------------------------------------------------------------------|
|          | Pc-H <sub>α</sub> '            | Pc-H <sub>β</sub> '                                         | H <sub>α</sub>                 | inner set of binaphthyl substituents                                                                  | outer set of binaphthyl substituents                                                                                                                      |
| <b>1</b> | –                              | –                                                           | 8.40 (s, 8 H)<br>8.00 (s, 8 H) | 8.17(d, 8 H)<br>7.43(d, 8 H)<br>7.87 (d, 8 H)<br>6.75~6.86 (m, 8 H) <sup>[a]</sup>                    | 7.16 (d, 8 H)<br>7.00~7.07 (m, 16 H) <sup>[a]</sup><br>6.68~6.93 (m, 40 H) <sup>[a]</sup>                                                                 |
| <b>2</b> | 9.07 (d, 4 H)<br>8.89 (d, 4 H) | 8.39 ~ 8.42 (m, 4 H) <sup>[a]</sup><br>8.28 ~ 8.32 (m, 4 H) | 9.06 (s, 4 H)<br>8.73 (s, 4 H) | 8.78 (d, 4 H)<br>8.39 (d, 4 H) <sup>[a]</sup><br>8.51 (d, 4 H)<br>7.72 ~ 7.82 (m, 4 H) <sup>[a]</sup> | 7.84(d, 4 H)<br>7.67 ~ 7.71 (m, 4 H)<br>8.00 ~ 8.05 (m, 8 H) <sup>[a]</sup><br>7.72 ~ 7.82 (m, 8 H) <sup>[a]</sup><br>7.51 ~ 7.58 (m, 8 H) <sup>[a]</sup> |

<sup>[a]</sup> These signals overlap with each other.

**Table S2.** Comparison of the structural data for (*R*)- and (*S*)-**1**.

| Structural parameter                                             | ( <i>R</i> )- <b>1</b> | ( <i>S</i> )- <b>1</b> |
|------------------------------------------------------------------|------------------------|------------------------|
| Y-N <sub>4</sub> (Pc) plane distance (Å)                         | 1.383                  | 1.390                  |
| N <sub>4</sub> (Pc)-N <sub>4</sub> (Pc) plane distance (Å)       | 2.77                   | 2.78                   |
| dihedral angle between two N <sub>4</sub> planes(°)              | 0                      | 0                      |
| average dihedral angle $\varphi$ for the Pc ring(°) <sup>a</sup> | 5.10                   | 5.35                   |
| average twist angle(°) <sup>b</sup>                              | 42.49                  | 43.69                  |

<sup>a</sup> The average dihedral angle of the individual isoindole rings with respect to the corresponding N<sub>4</sub> mean plane. <sup>b</sup> Defined as the rotation angle of one macrocycle away from the eclipsed conformation of the two macrocycles.



**Table S3.** Crystal data and structure refinements of (*R*)- and (*S*)-**1**.

| compound                                | ( <i>R</i> )- <b>1</b> <sup>a</sup>                                 | ( <i>S</i> )- <b>1</b> <sup>a</sup>                                 |
|-----------------------------------------|---------------------------------------------------------------------|---------------------------------------------------------------------|
| Formula                                 | C <sub>224</sub> H <sub>108</sub> N <sub>16</sub> O <sub>16</sub> Y | C <sub>224</sub> H <sub>108</sub> N <sub>16</sub> O <sub>16</sub> Y |
| F.W.                                    | 3338.17                                                             | 3368.17                                                             |
| system                                  | tetragonal                                                          | tetragonal                                                          |
| space group                             | <i>I</i> <sub>4</sub>                                               | <i>I</i> <sub>4</sub>                                               |
| a                                       | 21.5507(5)                                                          | 21.6634(5)                                                          |
| b                                       | 21.5507(5)                                                          | 21.6634(5)                                                          |
| c                                       | 22.5192(14)                                                         | 22.6033(14)                                                         |
| α                                       | 90                                                                  | 90                                                                  |
| β                                       | 90                                                                  | 90                                                                  |
| γ                                       | 90                                                                  | 90                                                                  |
| Z                                       | 2                                                                   | 2                                                                   |
| volume                                  | 10458.7(7)                                                          | 10607.8(7)                                                          |
| F <sub>calcd</sub> / g cm <sup>-3</sup> | 1.070                                                               | 1.056                                                               |
| <i>F</i> 000                            | 3462                                                                | 3470                                                                |
| <i>R</i> <sub>int</sub> <i>I</i> > 2θ   | 0.0636                                                              | 0.0609                                                              |
| <i>R</i> <sub>w2</sub> <i>I</i> > 2θ    | 0.1554                                                              | 0.1507                                                              |
| <i>R</i> <sub>int</sub> all             | 0.0676                                                              | 0.0756                                                              |
| <i>R</i> <sub>w2</sub> all              | 0.1593                                                              | 0.1601                                                              |
| <i>S</i>                                | 1.055                                                               | 1.092                                                               |
| Absolute structure parameter            | 0.055(16)                                                           | 0.036(19)                                                           |
| CCDC number                             | 941795                                                              | 941796                                                              |

<sup>a</sup>In these structures, the unit cell includes a large region of disordered solvent molecules, which could not be modeled as discrete atomic sites. We employed PLATON/SQUEEZE to calculate the diffraction contribution of the solvent molecules and, thereby, to produce a set of solvent-free diffraction intensities. For (*R*)-**1**, the SQUEEZE calculations showed a total solvent accessible area volume of 1731 Å<sup>3</sup> and the residual electron density amounted to 481 electron per unit cell, corresponding to nearly 8 molecules of CH<sub>2</sub>Cl<sub>2</sub> and 8 molecules of CH<sub>3</sub>OH (about 2 CH<sub>2</sub>Cl<sub>2</sub> and 2 CH<sub>3</sub>OH molecules per asymmetric unit). As for (*S*)-**1**, the SQUEEZE calculations showed a total solvent accessible area volume of 1789 Å<sup>3</sup> and the residual electron density amounted to 335 electron per unit cell, corresponding to nearly 8 molecules of CH<sub>2</sub>Cl<sub>2</sub> (about 2 CH<sub>2</sub>Cl<sub>2</sub> molecules per asymmetric unit).
